# Supplementary material
Source: publisher site journal article supplement (https://www.dovepress.com/article/313879)
Supplement: Supplementary file 1 [file get_supplementary_file.php]

# 1 **Supplementary Method**

## 2 ***Traditional Features of Magnetic Resonance Imaging (MRI)***

3 The traditional quantitative features included:

4 (1) Lesion size: maximum dimension measured on the coronal or axial plane on hepatobiliary

5 phase (HBP) images;

6 (2) Apparent diffusion coefficient (ADC;  $b=800$  s/mm<sup>2</sup>) value;

7 (3) HBP signal intensity (SI);

8 (4) T1 value (T1N) and T1 reduction rate (T1D): T1N refers to T1 relaxation time of tumor in the

9 T1 mapping images before enhancement, and T1E is defined as T1 relaxation time after 20

10 minutes of injection of contrast agent, then T1D is equal to  $(T1N-T1E)/T1N$ .

11 The traditional qualitative MRI features included:

12 (1) Tumor margin: evaluated on coronal or axial HBP images, and divided into four types:

13 smooth single nodular (type I), nodular with perinodular extension (type II), polynodular fusion

14 (type III), and infiltrative (type IV);

15 (2) Dynamic enhanced pattern: arterial phase hyperenhancement and non-peripheral washout,

16 continuous enhancement, delayed enhancement, no or slight enhancement;

- 17 (3) Abnormal peritumoral perfusion on arterial phase: irregular and patchy peritumoral  
18 hyperenhancement on the arterial phase that became isointense with normal liver parenchyma  
19 in later dynamic phases;
- 20 (4) Tumor vessels on the arterial phase: visible intratumor blood vessel on the arterial phase;
- 21 (5) Rim enhancement on the arterial phase: ring-like enhancement with central relative  
22 hypointensity;
- 23 (6) SI on the arterial phase compared to normal liver parenchyma;
- 24 (7) Peritumoral hypointensity on HBP images: irregular or wedge-shaped hypointense areas  
25 around the tumor on HBP images;
- 26 (8) Target signs on HBP/diffusion-weighted imaging (DWI;  $b = 800 \text{ s/mm}^2$ ): ring-like high SI  
27 with central relative hypointensity;
- 28 (9) Intratumoral cystic portion or necrosis: defined as high SI areas inside the lesion on T2-  
29 weighted imaging (T2WI) or low SI areas not enhanced during dynamic enhancement;
- 30 (10) Intratumoral hemorrhage: high SI on T1-weighted imaging (T1WI) with variable SI on T2WI;
- 31 (11) Fat content: compared with the in-phase images, the tumor area had decreased SI on out-  
32 phase images;
- 33 (12) Tumor capsule: smooth, uniform, sharp border around most or all of the tumor, visible as  
34 an enhancing rim in the portal phase or transition phase;

35 (13) Vessel invasion (including blood vessels and bile ducts) or lymph node metastasis;  
 36 (14) Intratumoral septum: delayed enhanced strain-like septum could be seen in the portal  
 37 phase or transition phase

38

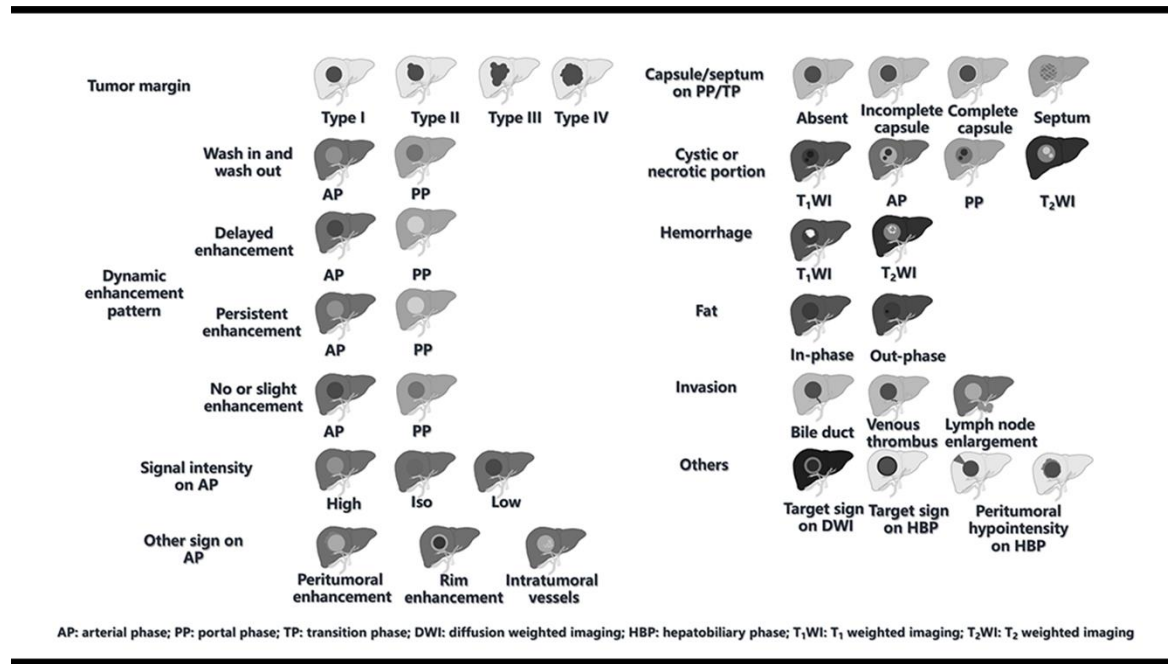

39 **Supplementary Figure 1.** Schematic Diagram of Gadoteric Acid-enhanced Magnetic  
 40 Resonance Imaging Findings

41

42 ***Image preprocessing***

43 Before the CT data were fed into the segmentation network, image preprocessing included  
 44 normalization, radiologist intervention, and data augmentation were performed as follows: (a)  
 45 Normalization: The CT values of the images were set between -120 HU and 230 HU, and then  
 46 all original intensities were normalized to decrease the data variance. (b) Radiologist

47 intervention: To improve the segmentation performance, the lesion of each patient was  
48 identified by radiologists who used three-dimensional rectangular boxes (region of interest, ROI)  
49 to completely enclose the area of the tumor. All transverse slices in each ROI were used as  
50 input to the segmentation network. (c) Data augmentation: A deep learning (DL) network usually  
51 requires a large amount of input data to train a model satisfactorily to avoid overfitting. We  
52 solved this problem by augmenting the training dataset by horizontal mirroring, image rotating,  
53 and image scaling.

54 Before the HBP images were fed into the segmentation model for semantic feature  
55 extraction, image preprocessing was also performed as follow: (a) Normalization: To speed up  
56 the gradient descent and search for the optimal solution, we perform a min-max normalization  
57 of the original data. (b) Radiologist intervention: The lesion of each patient was identified by  
58 radiologists who used ROI to completely enclose the area of the tumor. All transverse slices in  
59 each ROI were used as input to the segmentation network. (c) Resampling: The voxel size of  
60 all images was resampled to  $0.5 \text{ mm} \times 0.5 \text{ mm} \times 1.0 \text{ mm}$  using bicubic interpolation.

61

## 62 ***Training strategy of segmentation network***

63 U-Net is a typical encoder–decoder structure in DL. In our study, the U-Net network was  
64 used for segmentation tasks. The network was composed of two parts, encoder and decoder,  
65 and the connection between encoding and decoding was realized by skipping connection. In  
66 the training of this segmentation network, the cross-entropy loss was adopted and the

67 convolutional neural network segmentation network was optimized using Adam with the  
68 following parameters: basic learning rate= $1 \times 10^{-4}$ ; iteration=50,000. The entire training  
69 procedure took approximately 10 hours. The best segmentation model was selected by the dice  
70 coefficient on the validation set. The dice coefficient is calculated as

71 
$$DSC = \frac{2|A \cap B|}{|A| + |B|} \quad (1)$$

72 where A and B are the ground truth and the predicted segmentation mask of the tumor,  
73 respectively.

74

75 **Supplementary Tables**

76 **Supplementary Table 1** MR scan sequence and parameters

| sequence                                                                              | Orientation | Category | TR/ms | TE/ms   | FOV     | Matrix  | Thick-<br>ness/<br>mm | Band width/<br>(Hz/Px) | Reverse<br>angle |
|---------------------------------------------------------------------------------------|-------------|----------|-------|---------|---------|---------|-----------------------|------------------------|------------------|
| <b>Magnetom Trio A Tim 3.0T system (Siemens Healthcare Sector, Erlangen, Germany)</b> |             |          |       |         |         |         |                       |                        |                  |
| T <sub>2</sub> WI                                                                     | TRA         | TSE      | 2 000 | 81      | 328×350 | 240×320 | 5                     | 260                    | 150°             |
| T <sub>1</sub> WI                                                                     |             |          |       |         |         |         |                       |                        |                  |
| IN/OUT                                                                                | TRA         | FLASH    | 200   | 2.2/1.1 | 328×350 | 192×256 | 6                     | 930/977                | 65°              |
| PHASE                                                                                 |             |          |       |         |         |         |                       |                        |                  |
| DWI                                                                                   | TRA         | EPI      | 5 100 | 73      | 360×288 | 192×154 | 5                     | 2 004                  | /                |
| T <sub>1</sub> mapping                                                                | TRA         | VIBE     | 3.37  | 1.18    | 328×350 | 256×204 | 3                     | 500                    | 2/11°            |
| T <sub>1</sub> WI-FS                                                                  | TRA         | VIBE     | 3.3   | 1.2     | 328×350 | 128×256 | 2                     | 501                    | 13°              |
| Contrast-enhanced                                                                     |             |          |       |         |         |         |                       |                        |                  |
| T <sub>1</sub> WI                                                                     | TRA/<br>COR | VIBE     | 3.3   | 1.2     | 328×350 | 128×256 | 2                     | 501                    | 13°              |
| T <sub>1</sub> mapping                                                                | TRA         | VIBE     | 3.37  | 1.18    | 328×350 | 256×204 | 3                     | 500                    | 2/11°            |
| T <sub>1</sub> WI<br>(HBP)                                                            | TRA/<br>COR | VIBE     | 3.3   | 1.2     | 328×350 | 154×256 | 2                     | 501                    | 13°              |
| <b>GE 3.0T (750W, Pioneer) MR scanning system</b>                                     |             |          |       |         |         |         |                       |                        |                  |
| T <sub>2</sub> WI                                                                     | TRA         | TSE      | 2000  | 81      | 328×350 | 320×224 | 5                     | 260                    | 150°             |
| T <sub>1</sub> WI                                                                     |             |          |       |         |         |         |                       |                        |                  |
| IN/OUT                                                                                | TRA         | FLASH    | 200   | 2.2/1.1 | 328×350 | 320×208 | 4                     | 930/977                | 65°              |
| PHASE                                                                                 |             |          |       |         |         |         |                       |                        |                  |
| DWI                                                                                   | TRA         | EPI      | 5 100 | 73      | 360×288 | 128×128 | 5                     | 2 004                  | /                |
| T <sub>1</sub> WI-FS                                                                  | TRA         | LAVA     | 3.3   | 1.2     | 328×350 | 320×208 | 4                     | 501                    | 13°              |
| Contrast-enhanced                                                                     |             |          |       |         |         |         |                       |                        |                  |
| T <sub>1</sub> WI                                                                     | TRA/<br>COR | LAVA     | 3.3   | 1.2     | 328×350 | 320×208 | 4                     | 501                    | 13°              |
| T <sub>1</sub> WI<br>(HBP)                                                            | TRA/<br>COR | LAVA     | 3.3   | 1.2     | 328×350 | 320×208 | 4                     | 501                    | 20°              |

77

78 **Supplementary Table 2** Laboratory indicators and reference range

| Laboratory indicators     | Abbreviations | UNIT   | Reference range |
|---------------------------|---------------|--------|-----------------|
| Alanine amino transferase | <i>ALT</i>    | U/L    | 1-40            |
| Aspartic transaminase     | <i>AST</i>    | U/L    | 1-37            |
| Total bilirubin           | <i>TBIL</i>   | umol/L | 3-20            |
| Albumin                   | <i>ALB</i>    | g/L    | 35-50           |
| Prothrombin time          | <i>PT</i>     | s      | 11-14           |
| alpha fetoprotein         | <i>AFP</i>    | ug/L   | 0-20            |
| Carbohydrate antigen 19-9 | <i>CA19-9</i> | U/ml   | 0-35            |

79

80 **Supplementary Table 3** Univariate analyses of clinical characteristics in the training set

| Variables              | CK19+ (n=25) | CK19-(n=77) | Statistics<br>(t/ $\chi^2$ ) | <i>P</i> |
|------------------------|--------------|-------------|------------------------------|----------|
| age/y                  | 53±14        | 54±12       | 0.585                        | 0.369    |
| Sex                    |              |             | 0.792                        | 0.374    |
| male                   | 22 (88.0)    | 72 (93.5)   |                              |          |
| female                 | 3 (12.0)     | 5 (6.5)     |                              |          |
| History of hepatitis B |              |             | 0.792                        | 0.374    |
| yes                    | 22 (88.0)    | 72 (93.5)   |                              |          |
| no                     | 3 (12.0)     | 5 (6.5)     |                              |          |
| Child-pugh class       |              |             | 2.969                        | 0.085    |
| A                      | 23 (92.0)    | 76 (98.7)   |                              |          |
| B                      | 2 (8.0)      | 1 (1.3)     |                              |          |
| ALT (U/L)              |              |             | 1.298                        | 0.255    |
| >40                    | 6 (24.0)     | 28 (36.4)   |                              |          |
| ≤40                    | 19 (76.0)    | 49 (63.6)   |                              |          |
| AST (U/L)              |              |             | 0.026                        | 0.871    |

| Variables     | CK19+ (n=25) | CK19-(n=77) | Statistics<br>(t/ $\chi^2$ ) | P      |
|---------------|--------------|-------------|------------------------------|--------|
| >37           | 8 (32.0)     | 26 (33.8)   |                              |        |
| ≤37           | 17 (68.0)    | 51 (66.2)   |                              |        |
| TBIL (umol/L) |              |             | 1.113                        | 0.291  |
| >20           | 7 (28.0)     | 14 (18.2)   |                              |        |
| ≤20           | 18 (72.0)    | 63 (81.8)   |                              |        |
| ALB (g/L)     |              |             | 0.572                        | 0.449  |
| <35           | 4 (16.0)     | 8 (10.4)    |                              |        |
| ≥35           | 21 (84.0)    | 69 (89.6)   |                              |        |
| PT (s)        |              |             | /                            | 1.000  |
| >14           | 0 (0.0)      | 1 (1.3)     |                              |        |
| ≤14           | 25 (100.0)   | 76 (98.7)   |                              |        |
| AFP (ug/L)    |              |             | 9.876                        | 0.002* |
| >400          | 12 (48.0)    | 13 (16.9)   |                              |        |
| ≤400          | 13 (52.0)    | 64 (83.1)   |                              |        |
| CA19-9 (U/ml) |              |             | 2.239                        | 0.135  |
| >35           | 3 (12.0)     | 3 (3.9)     |                              |        |
| ≤35           | 22 (88.0)    | 74 (96.1)   |                              |        |

81 \*  $P < 0.05$

82 Values are represented as mean  $\pm$  standard deviation or number (percentage).

83



84 **Supplementary Table 4** Comparison of qualitative MRI findings between CK19 negative and  
 85 positive HCCs in training set

| MRI Features                           | CK19+<br>(n=25) | CK19-<br>(n=77) | κ value    | <i>P</i><br>value |
|----------------------------------------|-----------------|-----------------|------------|-------------------|
| Size                                   |                 |                 | 1.000      | 0.891             |
| >5 cm                                  | 10 (40)         | 32 (41.6)       |            |                   |
| ≤5 cm                                  | 15 (60)         | 45 (58.4)       |            |                   |
| Signal intensity on arterial phase     |                 |                 | 0.852 (1)  | 0.013*            |
| High                                   | 22 (88)         | 77 (100)        |            |                   |
| Low/Iso                                | 3 (12)          | 0 (0)           |            |                   |
| Dynamic enhancement pattern            |                 |                 | 0.662 (1)  | 0.432             |
| Wash in and wash out                   | 24 (96)         | 76 (98.7)       |            |                   |
| Delayed enhancement                    | 1 (4)           | 1 (1.3)         |            |                   |
| Persistent enhancement                 | 0               | 0               |            |                   |
| No or slight enhancement               | 0               | 0               |            |                   |
| Rim enhancement on arterial phase      |                 |                 | 0.731 (8)  | 0.018*            |
| Present                                | 9 (36)          | 11 (14.3)       |            |                   |
| Absent                                 | 16 (64)         | 66 (85.7)       |            |                   |
| Intratumoral vessels on arterial phase |                 |                 | 0.703 (14) | 0.483             |
| Present                                | 16 (64)         | 55 (71.4)       |            |                   |
| Absent                                 | 9 (36)          | 22 (28.6)       |            |                   |
| Peritumoral enhancement                |                 |                 | 0.762 (12) | 0.724             |
| Present                                | 11 (44)         | 37 (48.1)       |            |                   |
| Absent                                 | 14 (56)         | 40 (51.9)       |            |                   |
| Venous thrombus                        |                 |                 | 1.000      | 0.796             |

| MRI Features                               | CK19+<br>(n=25) | CK19-<br>(n=77) | $\kappa$ value | <i>P</i><br>value |
|--------------------------------------------|-----------------|-----------------|----------------|-------------------|
| Present                                    | 2 (8)           | 5 (6.5)         |                |                   |
| Absent                                     | 23 (92)         | 72 (93.5)       |                |                   |
| Bile duct involvement                      |                 |                 | 0.928 (1)      | 0.242             |
| Present                                    | 3 (12)          | 4 (5.2)         |                |                   |
| Absent                                     | 22 (88)         | 73 (94.8)       |                |                   |
| Lymph node enlargement                     |                 |                 | 1.000          | 0.568*            |
| Present                                    | 0 (0)           | 2 (2.6)         |                |                   |
| Absent                                     | 25 (100)        | 75 (97.4)       |                |                   |
| Intratumoral cystic or necrotic<br>portion |                 |                 | 0.709 (15)     | 0.914             |
| Present                                    | 13 (52)         | 41 (53.2)       |                |                   |
| Absent                                     | 12 (48)         | 36 (46.8)       |                |                   |
| Intratumoral fat                           |                 |                 | 0.787 (7)      | 0.181             |
| Present                                    | 3 (12)          | 19 (24.7)       |                |                   |
| Absent                                     | 22 (88)         | 58 (75.3)       |                |                   |
| Intratumoral hemorrhage                    |                 |                 | 0.708 (12)     | 0.654             |
| Present                                    | 9 (36)          | 24 (31.2)       |                |                   |
| Absent                                     | 16 (64)         | 53 (68.8)       |                |                   |
| Tumor capsule                              |                 |                 | 0.637 (23)     | 0.726             |
| Complete                                   | 3 (12)          | 14 (18.2)       |                |                   |
| Incomplete                                 | 12 (48)         | 37 (48.1)       |                |                   |
| Absent                                     | 10 (40)         | 26 (33.8)       |                |                   |
| Target sign on DWI                         |                 |                 | 0.777 (8)      | 0.001*            |
| Present                                    | 13 (52)         | 14 (18.2)       |                |                   |
| Absent                                     | 12 (48)         | 63 (81.8)       |                |                   |

| MRI Features                                      | CK19+<br>(n=25) | CK19-<br>(n=77) | $\kappa$ value | <i>P</i><br>value |
|---------------------------------------------------|-----------------|-----------------|----------------|-------------------|
| Peritumor hypointensity on HBP                    |                 |                 | 0.726 (14)     | 0.359             |
| Present                                           | 11 (44)         | 42 (54.5)       |                |                   |
| Absent                                            | 14 (56)         | 35 (45.5)       |                |                   |
| Margin                                            |                 |                 | 0.832 (10)     | 0.101             |
| I                                                 | 0 (0)           | 9 (11.7)        |                |                   |
| II                                                | 7 (28)          | 25 (32.5)       |                |                   |
| III                                               | 16 (64)         | 42 (54.5)       |                |                   |
| IV                                                | 2 (8)           | 1 (1.3)         |                |                   |
| Target sign on HBP                                |                 |                 | 0.736 (10)     | 0.005*            |
| Present                                           | 12 (48)         | 15 (19.5)       |                |                   |
| Absent                                            | 13 (52)         | 62 (80.5)       |                |                   |
| Intratumoral septum on<br>portal/transition phase |                 |                 | 0.899 (5)      | 0.092             |
| Present                                           | 19 (76)         | 44 (57.1)       |                |                   |
| Absent                                            | 6 (24)          | 33 (42.9)       |                |                   |

86 \*  $P < 0.05$

87 Values are represented as mean  $\pm$  standard deviation or number (percentage).

88 Data of  $\kappa$  value in parentheses are the number of discordant cases in each variable.

89
